# Supplementary material for: Prenatal and Postpartum Maternal Iodide Intake from Diet and Supplements, Urinary Iodine and Thyroid Hormone Concentrations in a Region of the United Kingdom with Mild-to-Moderate Iodine Deficiency
Source: Nutrients. 2021 Jan 14;13(1):230. doi: 10.3390/nu13010230 (PMC7830764; doi:10.3390/nu13010230)
Supplement: Supplementary file 1 [file nutrients-13-00230-s001.pdf]

## SUPPLEMENTARY MATERIAL

Table S1: Category details for dietary iodide source

| Category name                          | Details                                                                                                                                                                                                                            |
|----------------------------------------|------------------------------------------------------------------------------------------------------------------------------------------------------------------------------------------------------------------------------------|
| Dairy only                             | Foods where dairy is the only or major ingredient: Milk, cream, butter, cheese, yoghurt etc.                                                                                                                                       |
| Dairy with cereal, with or without egg | Composite foods with a dairy and cereal content, with or without eggs. Including pizza, pasta dishes with dairy, pastry, biscuits, batters/pancakes, cakes/sponge, desserts, rice pudding, cheese sandwiches, custard, quiche etc. |
| Eggs, egg dishes                       | All eggs, egg curry and flan where eggs formed the main dish component and the dish contained little/no cereal or dairy                                                                                                            |
| Cereals                                | Breads, rice and other grains or dishes prepared without a large proportion of dairy, fish, egg or meat                                                                                                                            |
| White fish                             | Haddock, cod etc. including battered and bread-crumbed fish                                                                                                                                                                        |
| Other seafood                          | All seafood not classed as white fish, including salmon, trout, prawns etc.                                                                                                                                                        |
| Poultry or red meat and dishes         | Poultry or meat as the only or main component of a dish                                                                                                                                                                            |
| Fruit, vegetables, pulses and dishes   | All raw or cooked fruit, vegetables, or pulses or dishes containing these without a large proportion of dairy, fish, egg or meat                                                                                                   |
| Confectionery                          | Chocolate, filled chocolates and chocolate-coated biscuits/wafers                                                                                                                                                                  |
| Other                                  | Any other item not categorised above, including condiments, nuts and soy products                                                                                                                                                  |

Table S2: Maternal characteristics according to use of iodide supplements in pregnancy

|                                                                                     | All            | No reported use of iodide containing supplements in pregnancy | Used iodide-containing supplement at any time in pregnancy |
|-------------------------------------------------------------------------------------|----------------|---------------------------------------------------------------|------------------------------------------------------------|
| N                                                                                   | 246            | 86                                                            | 160                                                        |
| Age (years) Median (IQR)                                                            | 31 (27, 34)    | 29 (25, 33)                                                   | 32 (28, 35)                                                |
| BMI (kg/m <sup>2</sup> ) Median (IQR)                                               | 27 (23, 31)    | 28 (23, 32)                                                   | 26 (23, 31)                                                |
| First pregnancy (n (%))                                                             | 79 (32%)       | 24 (28%)                                                      | 55 (35%)                                                   |
| <i>Ethnic background (n (%))</i>                                                    |                |                                                               |                                                            |
| White British & European                                                            | 89 (36%)       | 26 (30%)                                                      | 63 (39%)                                                   |
| Pakistani                                                                           | 131 (53%)      | 49 (57%)                                                      | 82 (51%)                                                   |
| Other                                                                               | 26 (11%)       | 11 (13%)                                                      | 15 (9%)                                                    |
| <i>Highest education level (n (%))<sup>2</sup></i>                                  |                |                                                               |                                                            |
| <5 GCSE or equivalent                                                               | 32 (13%)       | 12 (14%)                                                      | 20 (13%)                                                   |
| 5+ GCSE or equivalent                                                               | 58 (24%)       | 24 (28%)                                                      | 34 (21%)                                                   |
| A-level equivalent                                                                  | 43 (17%)       | 11 (13%)                                                      | 32 (20%)                                                   |
| Higher than A-level                                                                 | 105 (43%)      | 35 (41%)                                                      | 70 (44%)                                                   |
| Other/ Don't know                                                                   | 8 (3%)         | 4 (5%)                                                        | 4 (3%)                                                     |
| <i>NS-SEC (n (%))<sup>3</sup></i>                                                   |                |                                                               |                                                            |
| Managerial, administrative & professional                                           | 81 (33%)       | 22 (26%)                                                      | 59 (37%)                                                   |
| Intermediate occupations or Small employers & own account workers                   | 40 (16%)       | 14 (16%)                                                      | 26 (16%)                                                   |
| Lower supervisory & technical or Semi-routine & routine                             | 42 (17%)       | 16 (19%)                                                      | 26 (16%)                                                   |
| Never worked                                                                        | 83 (34%)       | 34 (40%)                                                      | 49 (31%)                                                   |
| Smoked in 1 <sup>st</sup> trimester (n (%))                                         | 15 (6%)        | 5 (6%)                                                        | 10 (6%)                                                    |
| Alcohol in 1 <sup>st</sup> trimester (n (%))                                        | 17 (7%)        | 3 (3%)                                                        | 14 (9%)                                                    |
| Vegan or vegetarian (n (%))                                                         | 11 (4%)        | <3                                                            | 10 (6%)                                                    |
| <i>Total iodide intake (diet &amp; supplements) in pregnancy (µg/d)<sup>1</sup></i> |                |                                                               |                                                            |
| Geometric mean (95% CI)                                                             | 136 (126, 146) | 97 (85, 111)                                                  | 162 (150, 175)                                             |
| Median (IQR)                                                                        | 143 (94, 196)  | 97 (76, 136)                                                  | 168 (126, 226)                                             |
| <i>Total iodide intake in pregnancy compared to RNI (n (%))<sup>1</sup></i>         |                |                                                               |                                                            |
| < WHO recommendations (250 µg/day)                                                  | 219 (89%)      | 82 (95%)                                                      | 137 (86%)                                                  |
| < UK RNI (140 µg/day)                                                               | 119 (48%)      | 66 (77%)                                                      | 53 (33%)                                                   |
| < UK LRNI (70 µg/day)                                                               | 28 (11%)       | 19 (22%)                                                      | 9 (6%)                                                     |
| <i>Dietary iodide intake in pregnancy (µg/d)<sup>1</sup></i>                        |                |                                                               |                                                            |
| Geometric Mean (95% CI)                                                             | 96 (89, 105)   | 97 (85, 111)                                                  | 96 (87, 106)                                               |
| Median (IQR)                                                                        | 101 (64, 142)  | 97 (76, 136)                                                  | 104 (62, 147)                                              |
| <i>Supplement use (n (%))</i>                                                       |                |                                                               |                                                            |
| Used any supplement prior to pregnancy <sup>4</sup>                                 | 80 (33%)       | 21 (24%)                                                      | 59 (37%)                                                   |
| Used any supplement in 1 <sup>st</sup> trimester                                    | 220 (89%)      | 64 (72%)                                                      | 156 (98%)                                                  |
| <i>Supplements containing iodide (n (%))</i>                                        |                |                                                               |                                                            |
| Used supplement containing iodide prior to pregnancy <sup>4</sup>                   | 26 (11%)       | 3 (3%)                                                        | 23 (14%)                                                   |
| Used supplement containing iodide in 1 <sup>st</sup> trimester                      | 110 (45%)      | 0 (0%)                                                        | 110 (69%)                                                  |
| <i>Iodide intake from supplements in pregnancy (µg/d)<sup>1</sup></i>               |                |                                                               |                                                            |
| Geometric mean (95% CI)                                                             | 12 (9, 16)     | 0 (0, 0)                                                      | 54 (48, 60)                                                |
| Median (IQR)                                                                        | 35 (0, 68)     | 0 (0, 0)                                                      | 54 (36, 89)                                                |
| <i>Urinary iodine concentration in pregnancy (µg/l)<sup>1</sup></i>                 |                |                                                               |                                                            |
| Geometric mean (95% CI)                                                             | 131 (121, 143) | 127 (112, 144)                                                | 134 (120, 150)                                             |
| Median (IQR)                                                                        | 135 (90, 207)  | 126 (83, 200)                                                 | 141 (90, 220)                                              |
| <i>Iodine:Creatinine in pregnancy (µg/g)<sup>1</sup></i>                            |                |                                                               |                                                            |
| Geometric mean (95% CI)                                                             | 128 (119, 137) | 107 (95, 120)                                                 | 140 (129, 153)                                             |
| Median (IQR)                                                                        | 126 (88, 187)  | 109 (73, 138)                                                 | 138 (95, 209)                                              |
| Presence of any palpable goitre in pregnancy (n (%)) <sup>1,5</sup>                 | 89 (36%)       | 25 (29%)                                                      | 64 (40%)                                                   |

Values are at baseline unless otherwise stated. Values are median (IQR) or n (%), unless otherwise stated

<sup>1</sup> Values are averages from data collected over 3 pregnancy visits.

<sup>2</sup> UK-equivalised overseas qualifications

<sup>3</sup> Some NS-SEC categories were combined because of small cell counts

<sup>4</sup> In the 3 months prior to pregnancy

<sup>5</sup> Grade 1 or 2 goitre, according to World Health Organisation 1994 criteria

Table S3: Dietary sources of iodide across all study visits, by ethnic group

|                                                           | All<br>n=246                                   |                | Pakistani<br>n=131                             |                | White British & European<br>n=89               |                | Other<br>n=26                                  |                |
|-----------------------------------------------------------|------------------------------------------------|----------------|------------------------------------------------|----------------|------------------------------------------------|----------------|------------------------------------------------|----------------|
|                                                           | Geometric mean <sup>2</sup><br>(µg/d) (95% CI) | % <sup>3</sup> | Geometric mean <sup>2</sup><br>(µg/d) (95% CI) | % <sup>3</sup> | Geometric mean <sup>2</sup><br>(µg/d) (95% CI) | % <sup>3</sup> | Geometric mean <sup>2</sup><br>(µg/d) (95% CI) | % <sup>3</sup> |
| <i>Total iodide intake (µg/d) Geometric mean (95% CI)</i> | 125 (118, 134)                                 |                | 117 (108, 127)                                 |                | 133 (121, 147)                                 |                | 143 (102, 199)                                 |                |
| <i>Iodide intake from dietary sources (µg/d)</i>          | 101 (94, 108)                                  |                | 96 (88, 105)                                   |                | 103 (94, 114)                                  |                | 119 (84, 169)                                  |                |
| <i>Dietary iodide from each food source <sup>1</sup></i>  |                                                |                |                                                |                |                                                |                |                                                |                |
| Dairy                                                     | 34 (30, 38)                                    | 41%            | 29 (25, 34)                                    | 37%            | 41 (33, 50)                                    | 46%            | 34 (22, 55)                                    | 39%            |
| Dairy with cereal                                         | 7 (5, 8)                                       | 12%            | 5 (4, 6)                                       | 10%            | 10 (8, 12)                                     | 14%            | 6 (3, 10)                                      | 9%             |
| Eggs                                                      | 5 (4, 7)                                       | 13%            | 9 (7, 12)                                      | 17%            | 3 (2, 4)                                       | 7%             | 2 (1, 4)                                       | 5%             |
| Cereals                                                   | 3 (2, 3)                                       | 4%             | 3 (2, 3)                                       | 4%             | 3 (2, 3)                                       | 4%             | 2 (1, 3)                                       | 5%             |
| White Fish                                                | 2 (2, 3)                                       | 12%            | 3 (2, 4)                                       | 13%            | 1 (1, 2)                                       | 7%             | 7 (2, 20)                                      | 24%            |
| Other seafood                                             | 1 (<1, 1)                                      | 2%             | <1 (<1, <1)                                    | 2%             | 1 (<1, 1)                                      | 2%             | 1 (<1, 2)                                      | 3%             |
| Poultry and red meat                                      | 7 (6, 7)                                       | 9%             | 7 (6, 8)                                       | 10%            | 6 (5, 7)                                       | 8%             | 6 (4, 9)                                       | 10%            |
| Fruit, vegetables & pulses                                | 4 (4, 5)                                       | 6%             | 4 (4, 4)                                       | 5%             | 5 (4, 6)                                       | 7%             | 4 (3, 5)                                       | 4%             |
| Confectionery                                             | 1 (1, 1)                                       | 2%             | <1 (<1, 1)                                     | 1%             | 2 (1, 2)                                       | 3%             | 1 (<1, 1)                                      | 1%             |
| Other                                                     | <1 (<1, <1)                                    | 1%             | <1 (<1, <1)                                    | <1%            | <1 (<1, 1)                                     | 1%             | <1 (<1, <1)                                    | <1%            |

<sup>1</sup> Category details are in Supplemental table 1

<sup>2</sup> Geometric means of individual dietary sources do not sum to geometric mean of total, because these are derived on the log scale to reflect skewed distribution of dietary intakes.

<sup>3</sup> Arithmetic mean percentage of each participant's diet from each food source.

Figure S1: Study participant flow chart

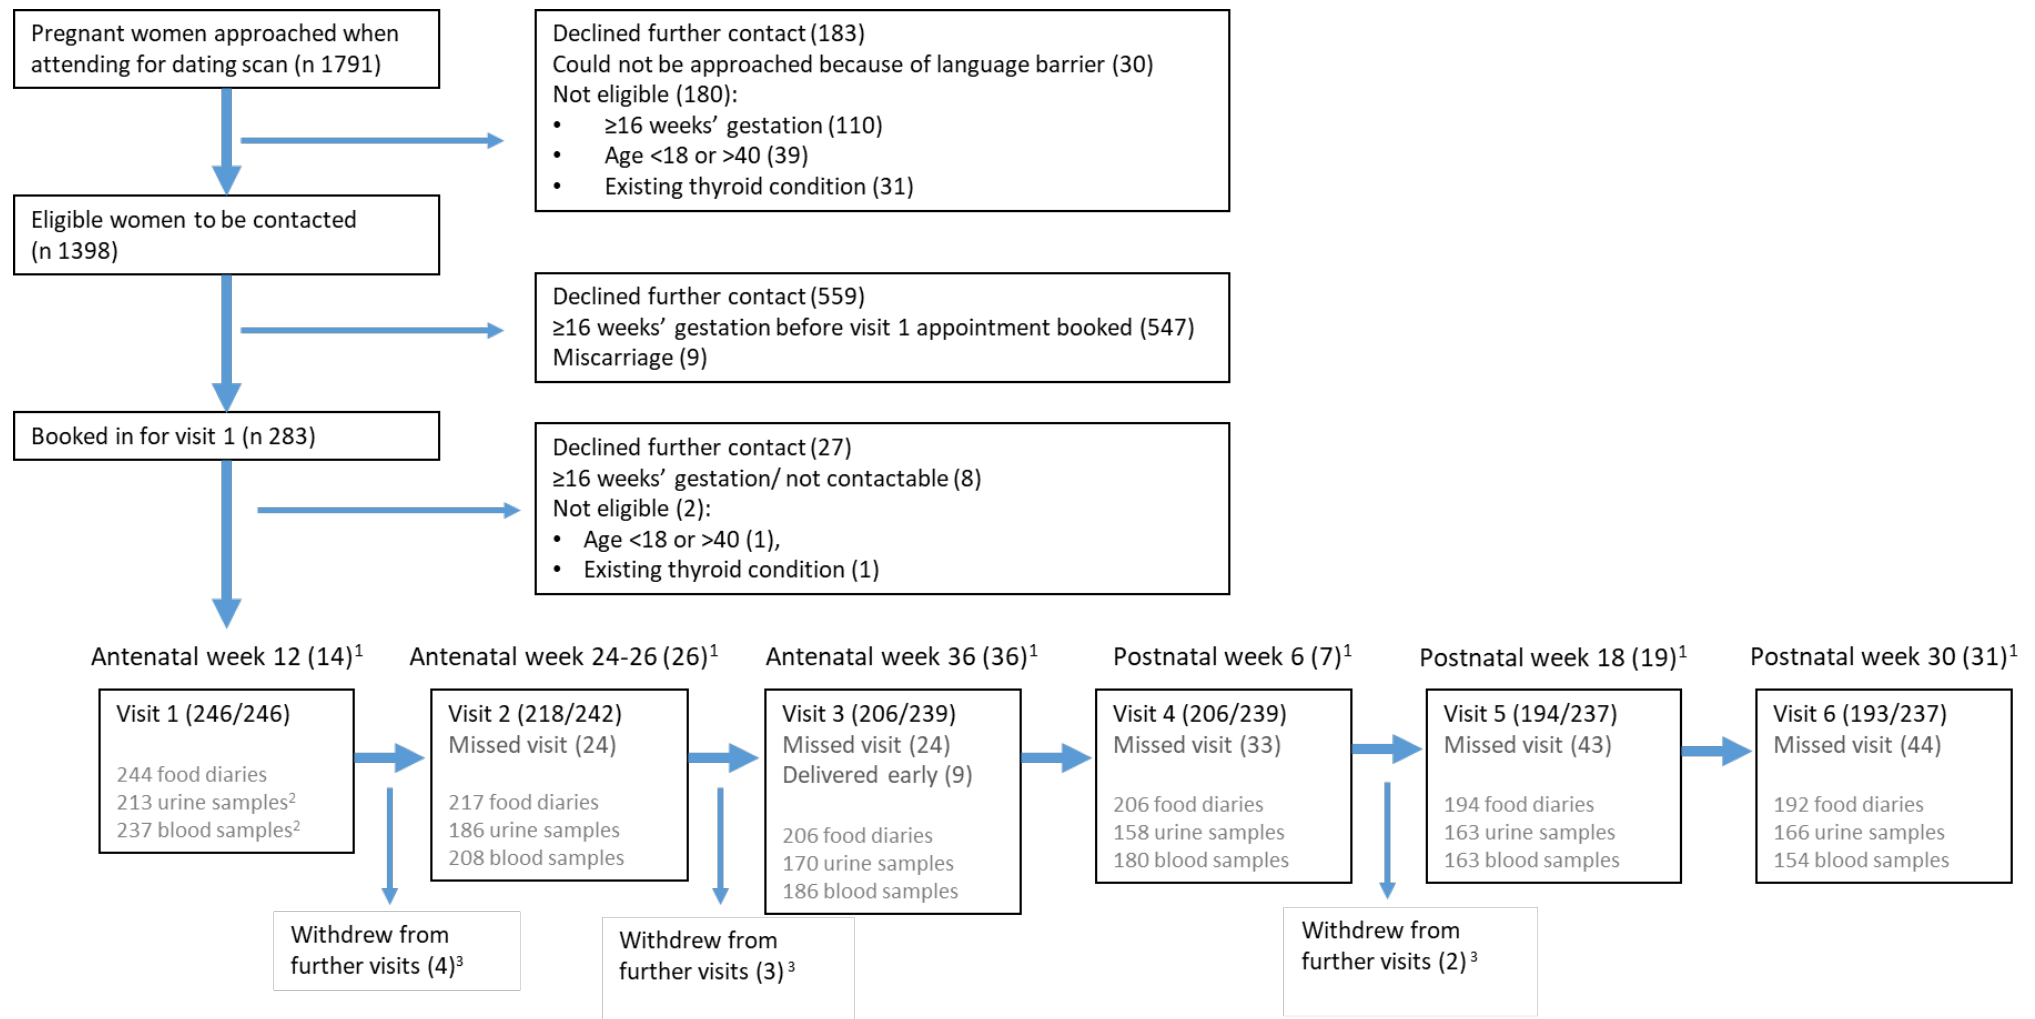

Notes:

<sup>1</sup>Target date (mean achieved date)

<sup>2</sup>Urine and blood sample numbers relate to viable samples with sufficient volume for testing

<sup>3</sup>Reasons for not participating in further visits include miscarriage, stillbirth, neonatal death, declined further contact and moved away. Numbers for each reason are withheld to avoid identifying individuals.
